# Supplementary material
Source: PubMed Central journal article supplement (PMC2645820)
Supplement: M809172200_1.pdf [file M809172200_1.pdf]

## Supplemental Data

**Table 1. PCR Primer Sequence**

| <b>Gene</b>  | <b>Forward Primer</b>  | <b>Reverse Primer</b>     |
|--------------|------------------------|---------------------------|
| GAPDH        | AGAACATCATCCCTGCATCC   | CACATTGGGGGTAGGAACAC      |
| Gli1         | GGAAGTCCTATTCACGCCTTGA | CAACCTTCTTGCTCACACATGTAAG |
| Ptc1         | CTCTGGAGCAGATTTCCAAGG  | TGCCGCAGTTCTTTTGAATG      |
| Igfbp-6      | AGCTCCAGACTGAGGTCTTCC  | GAACGACACTGCTGCTTGC       |
| Igfbp-3      | CAGGCAGCCTAAGCACCTAC   | CTTCCACACTCCCAGCATT       |
| Fbn2         | ACCAAGGGCAGTTACCAGTG   | ACTGGCAGTTGTGCTGTTTG      |
| Ntrk3        | TGTACCGGAAGTTCACCACA   | ATGACCTCCGTGTTGGAAAG      |
| Agpt4        | AGCAGCAACTGACGGAGTTT   | CTCTGCACAGTCCTGGAACA      |
| Dner         | CCTGCCAGGACCAGTACATT   | CCTGCTTCTCATTTGCATCA      |
| Hsd11b1      | ATGACCCAGCCTATGATTGC   | GAGGCCAAGGACACAGAGAG      |
| Artn         | CTGGGACTTGCAGAGCCTAC   | AGCTCAGCAGGGCTAGAACA      |
| Tnmd         | AGAATGAGCAATGGGTGGTC   | CAGCATTGGGTCAAATTCAA      |
| Timp3        | TTGGGTACCCTGGCTATCAG   | TTGCTGATGCTCTTGTCTGG      |
| Tiam1        | CCTCACTGGGAAAGTGGAAA   | TCTTCTGCTTGGAAACCGTCT     |
| Plxna2       | CCCCCTAGCCATCAAGTACA   | GAAGGCAGTTGCTTTTCCAG      |
| BRAK(Cxcl14) | TATCGTCACCACCAAGAGCA   | CTTCTGGTTCCAGGCATTGT      |
| Fgf5         | GAAAAGACAGGCCGAGAGTG   | GAAGTGGGTGGAGACGTGTT      |
| Dmp1         | CGGCTGGTGGACTCTCTAAG   | GCCCTAGACCATTGTCCTCA      |
| Mmp13        | AGTTGACAGGCTCCGAGAAA   | GGCACTCCACATCTTGGTTT      |
| Rgs4         | GCTATGGATTTGCCAGCTTC   | TGGGGGACTTGATCTTCTTG      |
| SuFu         | GGTCCCTGGCTGATAACTGA   | CCGTCTGTCTCAATGCCTTT      |

Figure 1

Dose-Response

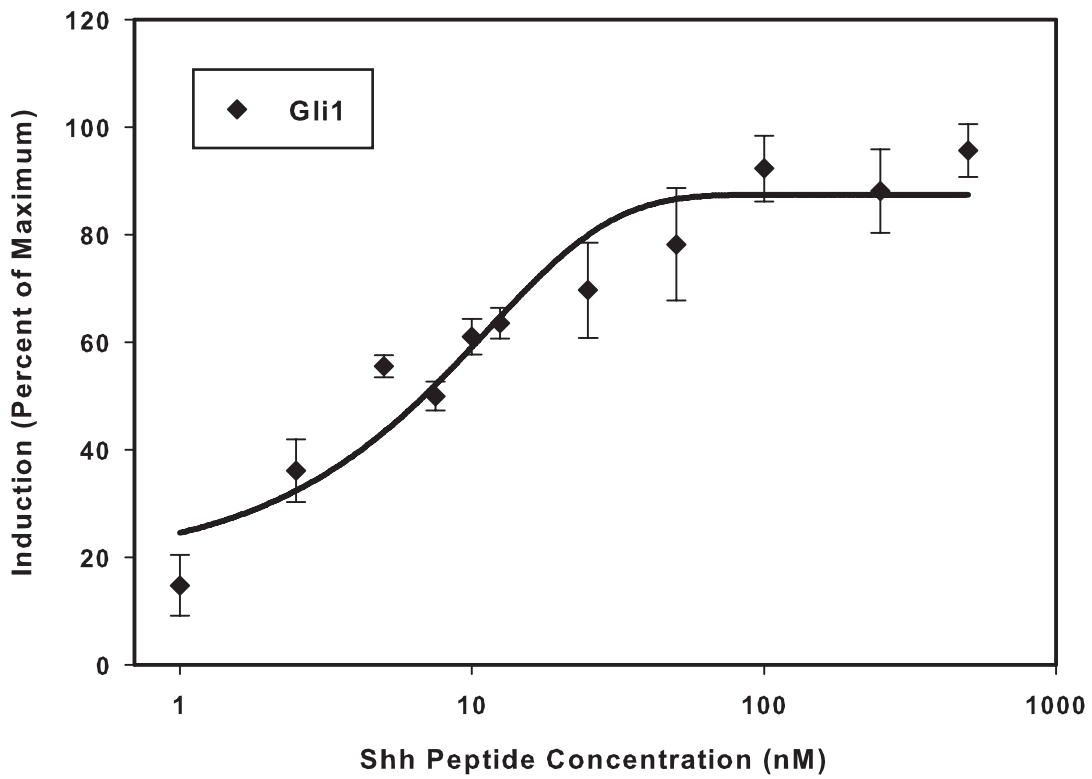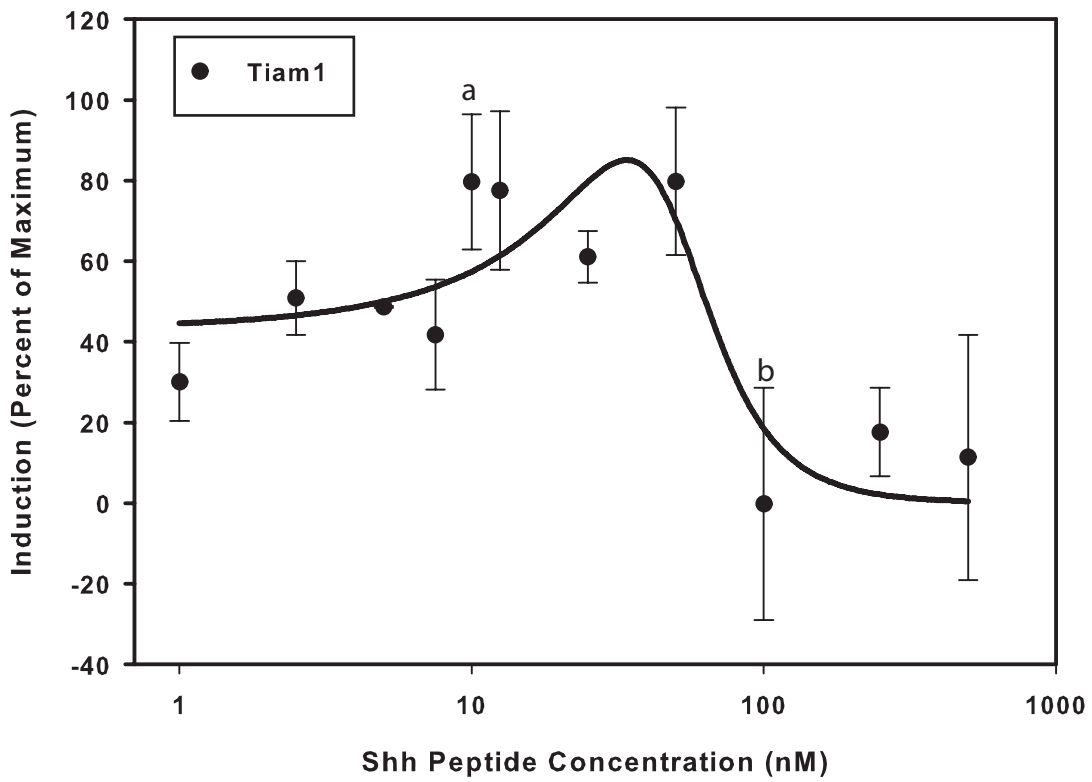

Figure 2

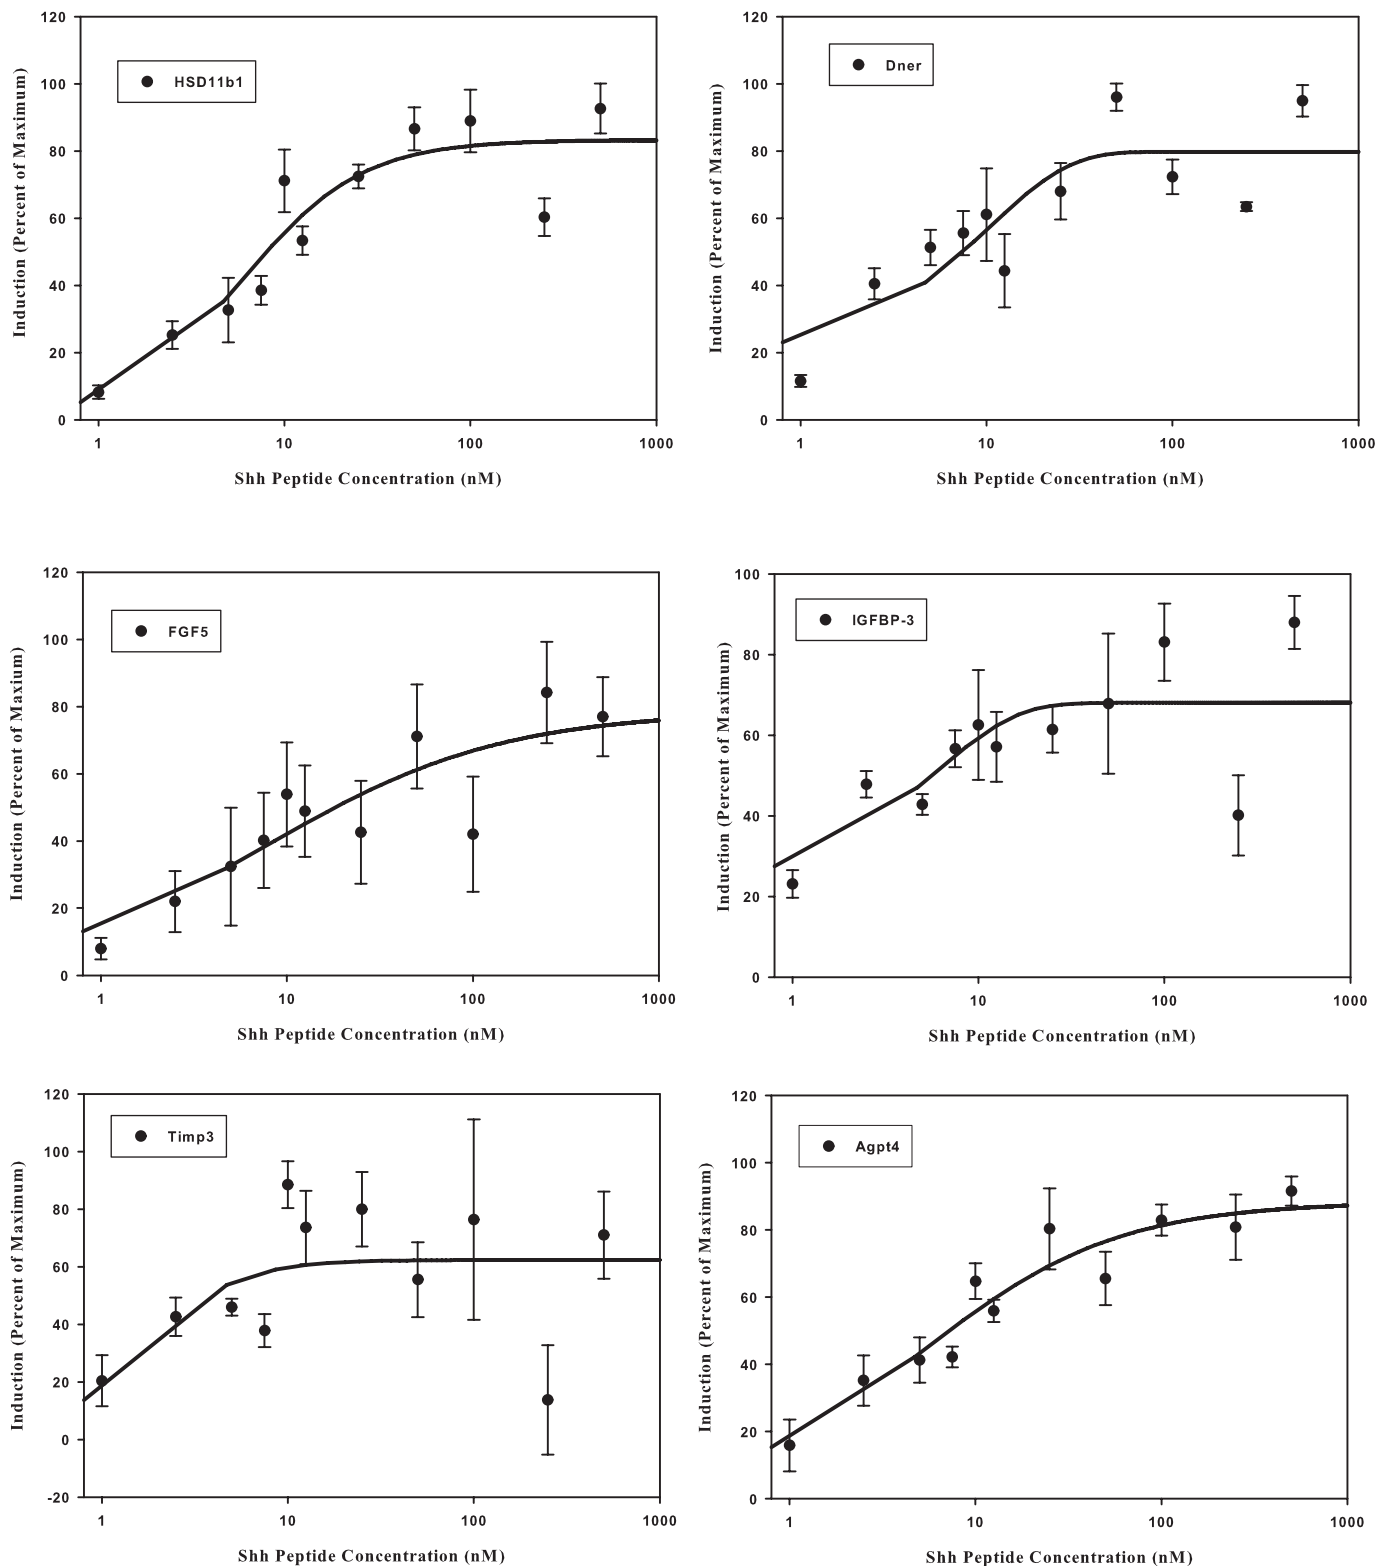

**Figure 3**

Conserved Gli1 binding motif: GAC CAC CCA

|               |          |         |                    |         |       |
|---------------|----------|---------|--------------------|---------|-------|
| 8 bp<br>match | Tiam1:   | TCC ACA | <u>GAC CAC CCA</u> | GCA CCA | -6676 |
|               | Fbn2:    | CTC TCT | <u>GAC CAC CAA</u> | GTT TCC | -644  |
|               | Plxna2:  | ACA AGG | <u>GAC CTC CCA</u> | CTT GGT | -7289 |
|               | Mmp13:   | TGA GAT | <u>GAC CAC CAA</u> | GAG CAT | -4060 |
|               | Tnmd:    | TGT GGT | <u>GAC CAC CAA</u> | ACA TAA | -3968 |
| 7 bp<br>match | Dner:    | CAG GCT | <u>GAC CTC CAA</u> | CAC TGC | -3623 |
|               | Hsd11b1: | CAA ACT | <u>CAC CTC CCA</u> | GAA AAG | -1322 |
|               | Artn:    | GTC CTG | <u>GAA CCC CCA</u> | ACT CCC | -606  |
|               | Rgs4:    | CCA CTC | <u>CAC CAC CAA</u> | GGA CAG | -1630 |
|               | Igfbp-3: | CCG GCC | <u>CAC CCC CCA</u> | CCC TCG | -71   |
